# Supplementary material for: Soil moisture and streamflow deficit anomaly index: an approach to quantify drought hazards by combining deficit and anomaly
Source: Copernicus journal article supplement (doi:10.5194/nhess-21-1337-2021), 2021-05-03
Supplement: Supplementary file 1 [file nhess-21-1337-2021-supplement.zip]

Archive with 12 entries (12 files):
- FigS6.png
- FigS4.png
- nhess-21-1337-2021-supplement-title-page.pdf
- FigS7b.png
- supplement_revised_2.pdf
- FigS5.png
- FigS2.png
- FigS7a.png
- FigS8.png
- FigS3.(b).jpg
- FigS1.PNG
- FigS3.(a).jpg
