# Supplementary material for: Soil moisture and streamflow deficit anomaly index: an approach to quantify drought hazards by combining deficit and anomaly
Source: Copernicus journal article supplement (doi:10.5194/nhess-21-1337-2021), 2021-05-03
Supplement: Supplementary file 1 [file nhess-21-1337-2021-supplement.zip › nhess-21-1337-2021-supplement-title-page.pdf]

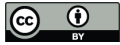

## *Supplement of*

# **Soil moisture and streamflow deficit anomaly index: an approach to quantify drought hazards by combining deficit and anomaly**

**Eklavyya Popat and Petra Döll**

*Correspondence to:* Eklavyya Popat ([popat@em.uni-frankfurt.de](mailto:popat@em.uni-frankfurt.de))

- [nhess-21-1337-2021-supplement-title-page.pdf](#)
- [FigS1.PNG](#)
- [FigS2.png](#)
- [FigS3.\(a\).jpg](#)
- [FigS3.\(b\).jpg](#)
- [FigS4.png](#)
- [FigS5.png](#)
- [FigS6.png](#)
- [FigS7a.png](#)
- [FigS7b.png](#)
- [FigS8.png](#)
- [supplement\\_revised\\_2.pdf](#)

The copyright of individual parts of the supplement might differ from the article licence.
