# Supplementary figures and images for: Soil moisture and streamflow deficit anomaly index: an approach to quantify drought hazards by combining deficit and anomaly
Source: Copernicus journal article supplement (doi:10.5194/nhess-21-1337-2021), 2021-05-03

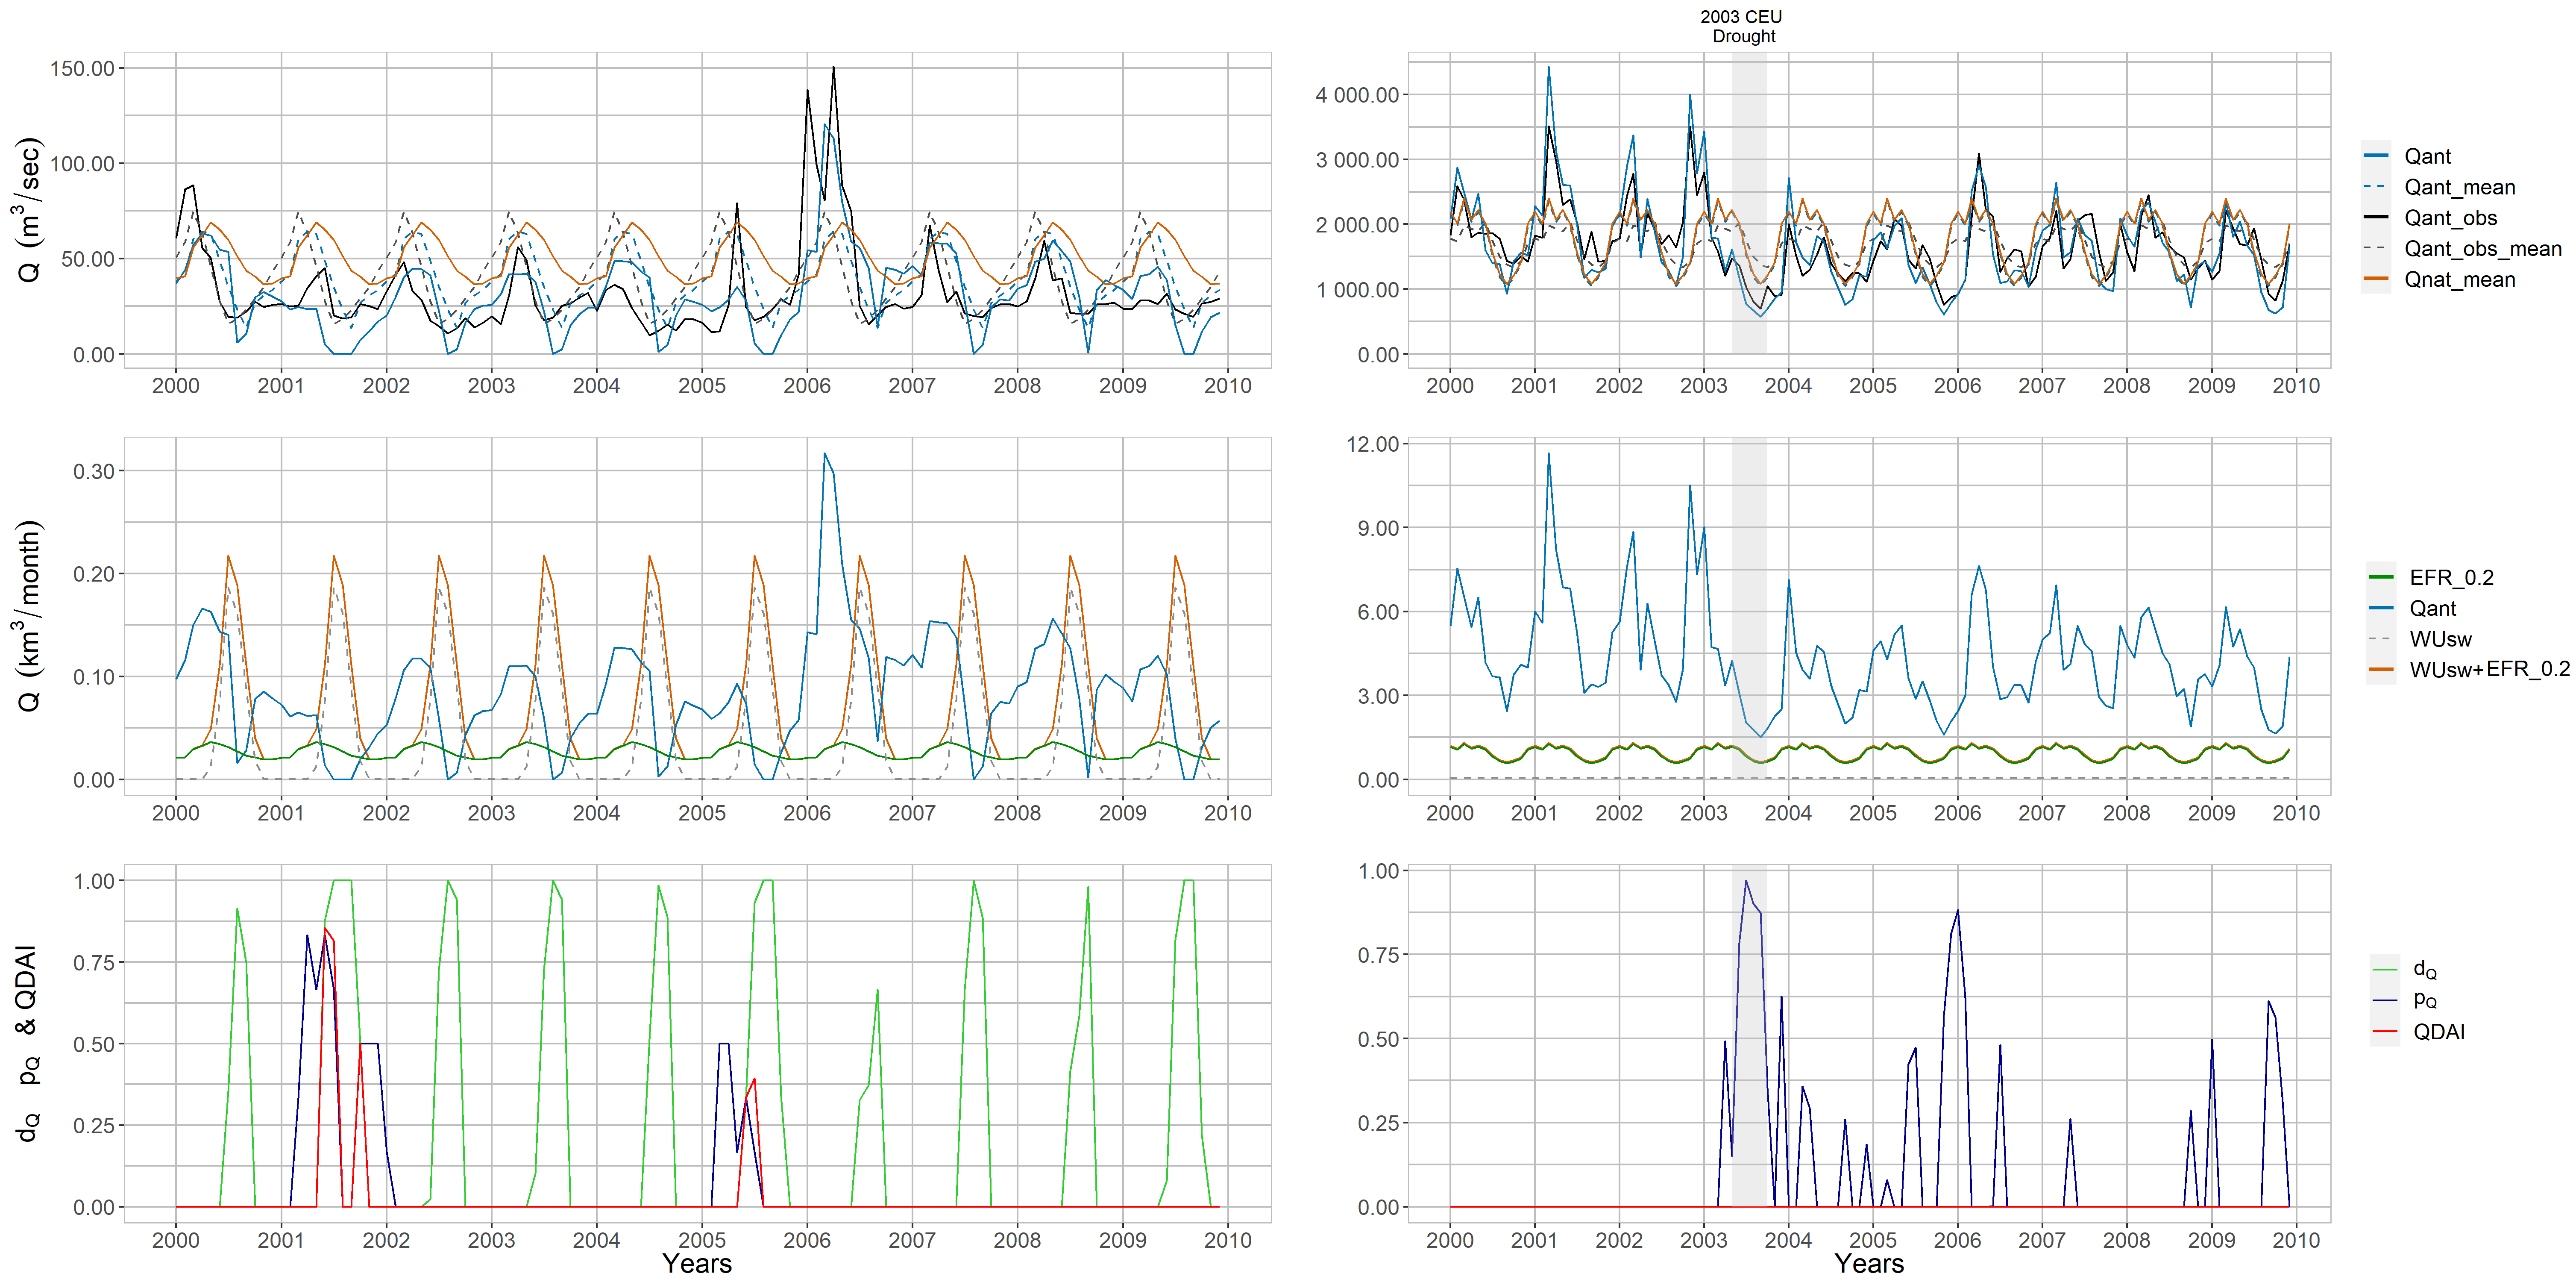

Supplement: Supplementary file 1 [file nhess-21-1337-2021-supplement.zip › FigS6.png]

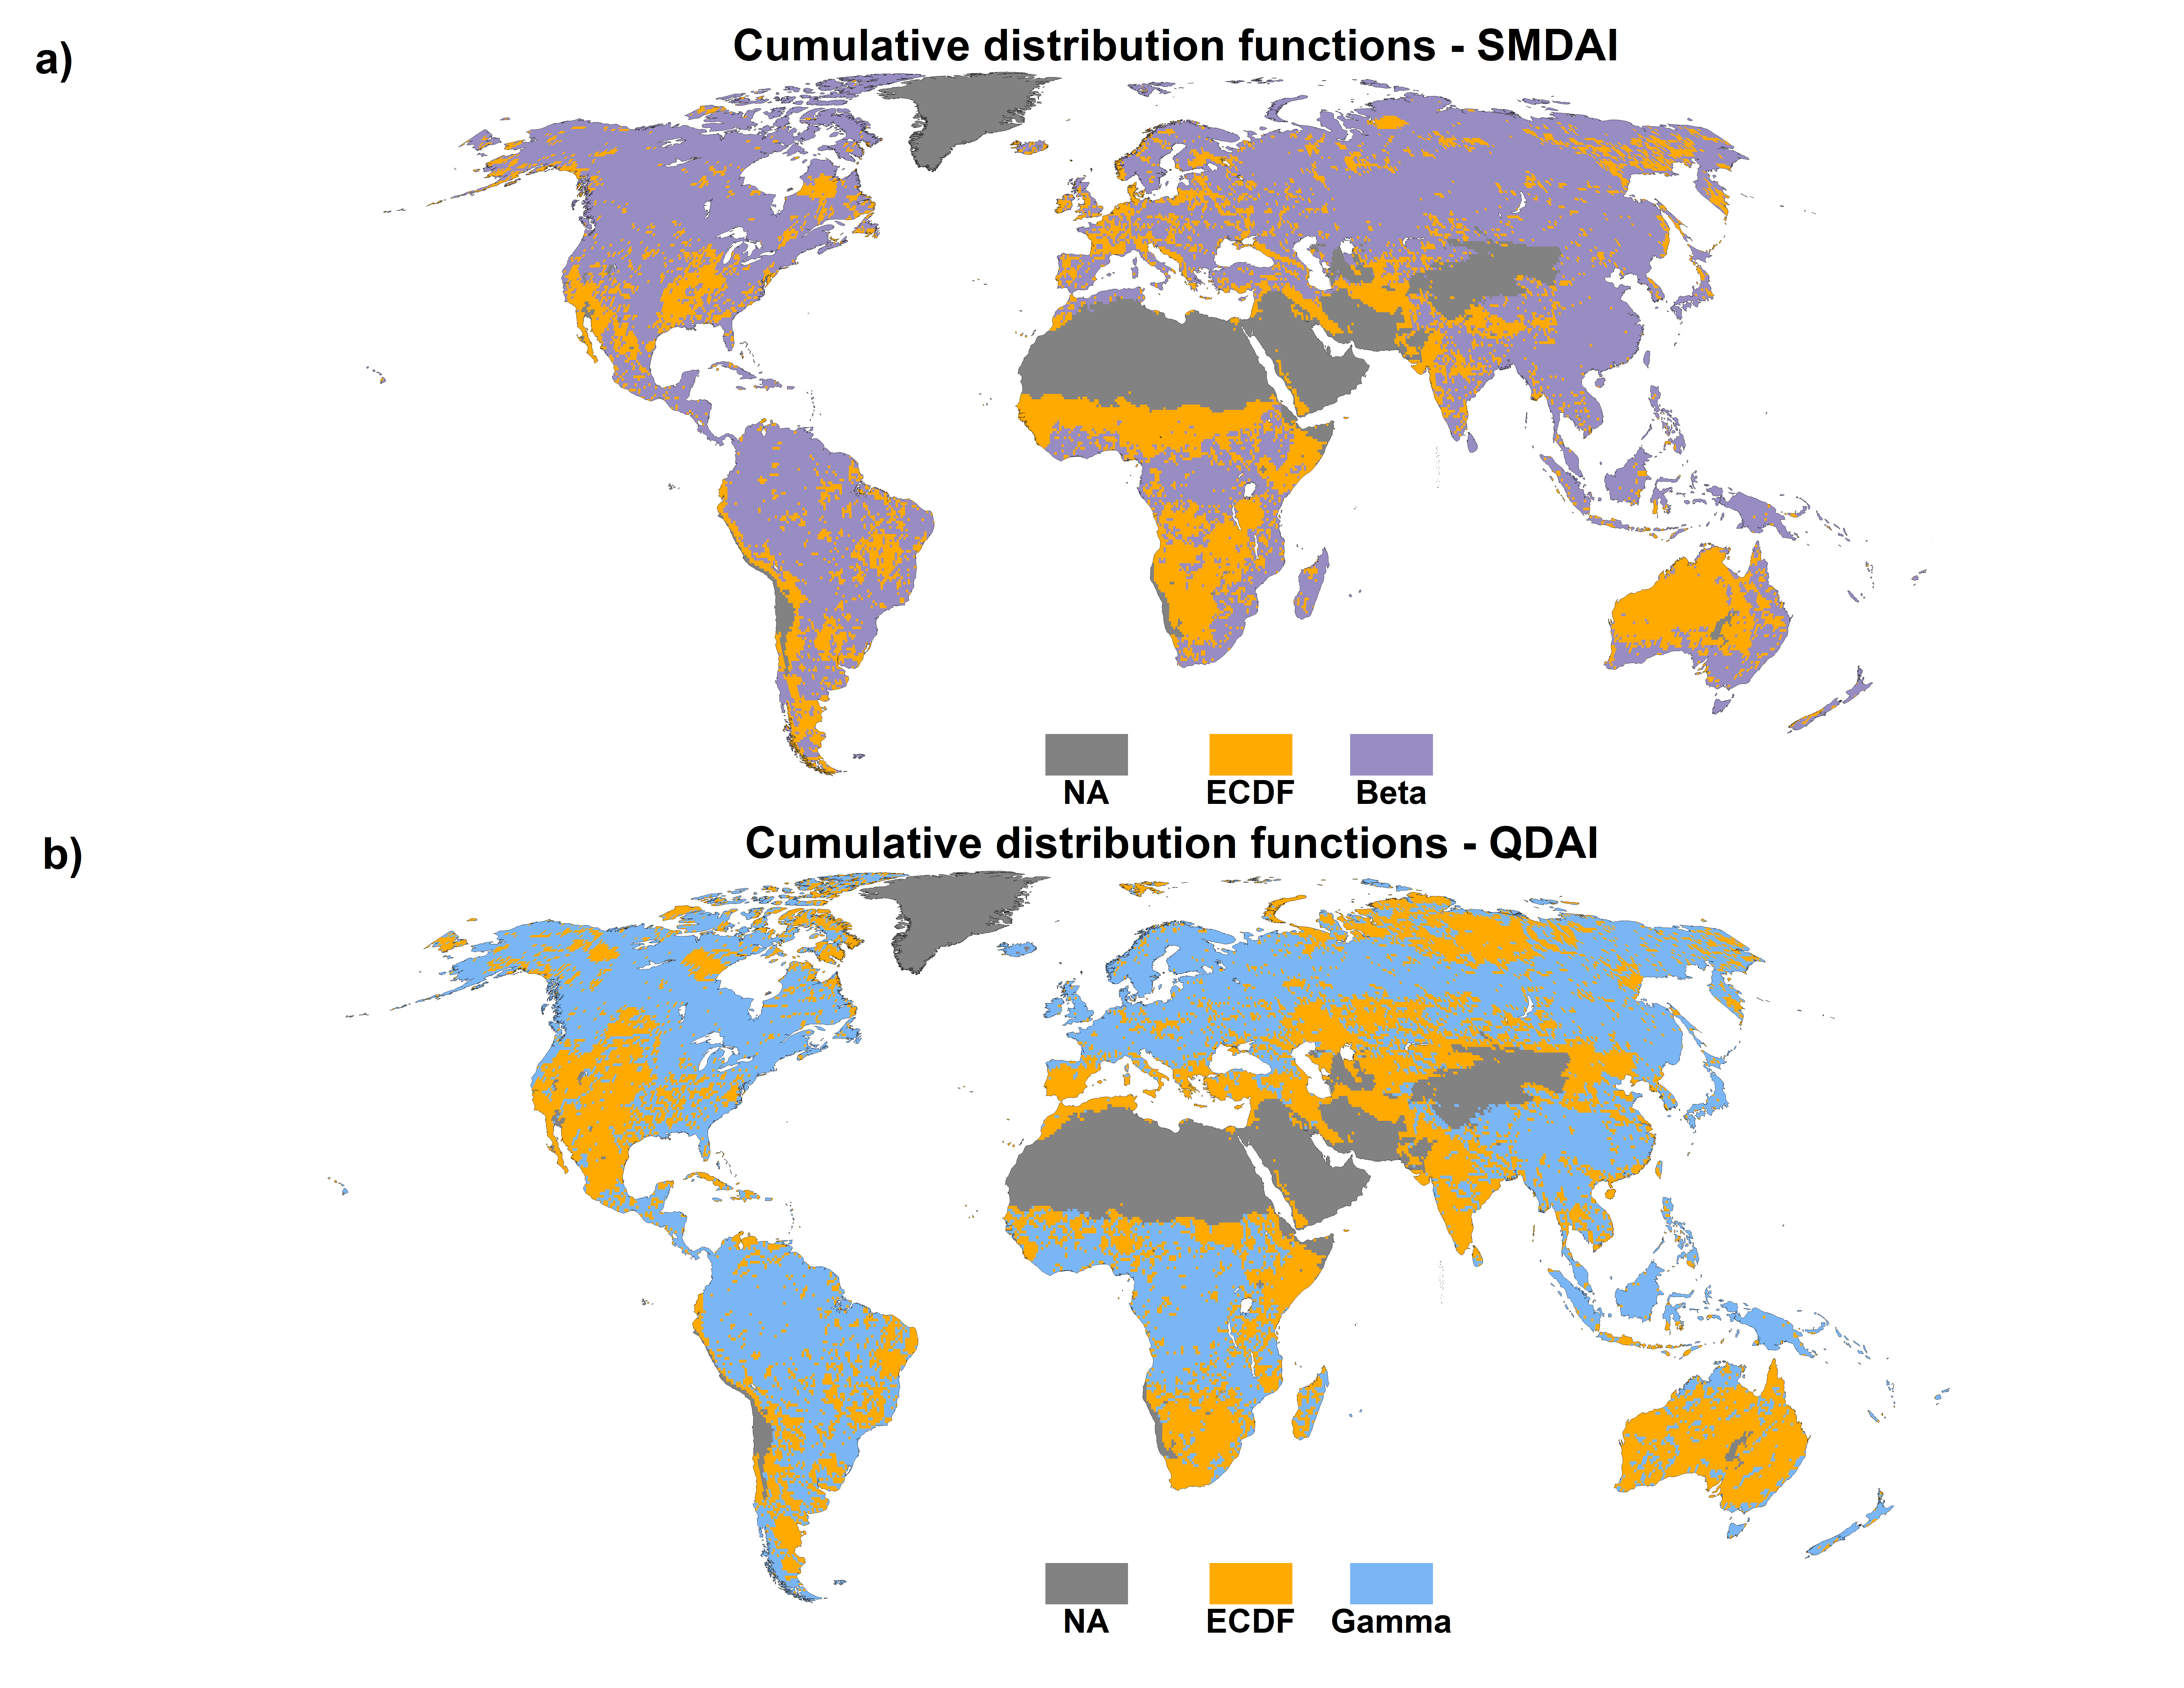

Supplement: Supplementary file 1 [file nhess-21-1337-2021-supplement.zip › FigS4.png]

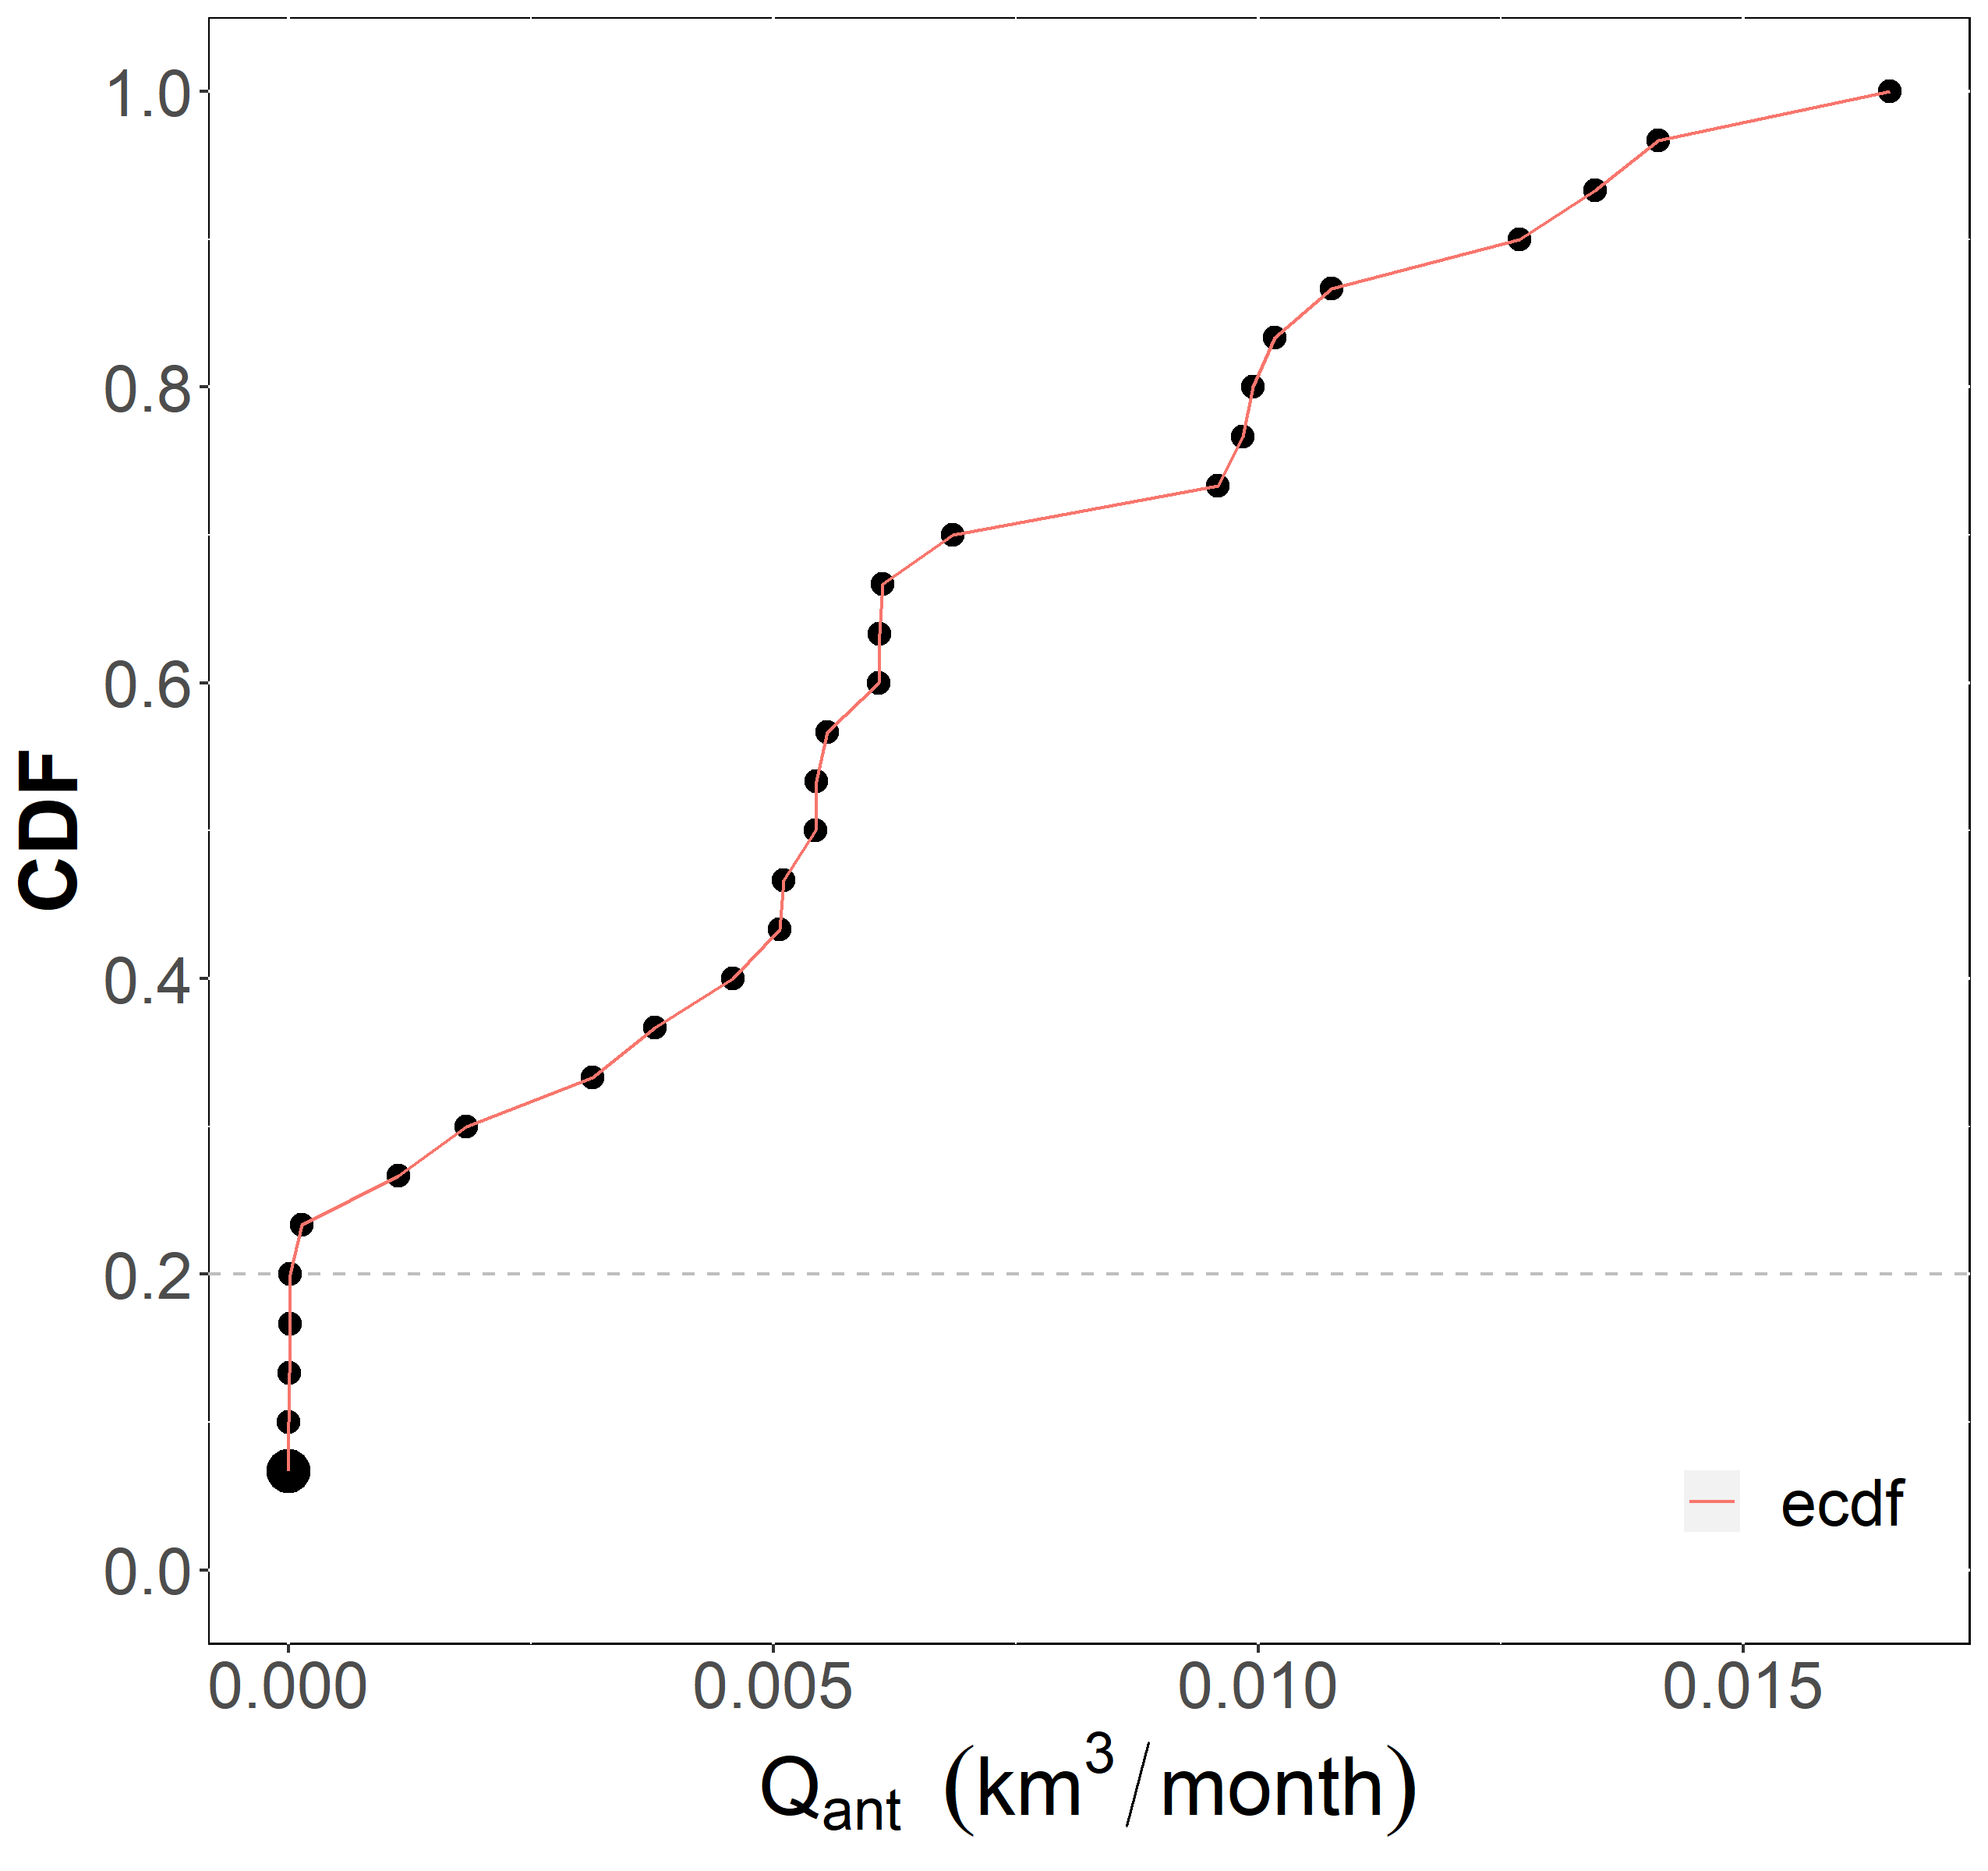

Supplement: Supplementary file 1 [file nhess-21-1337-2021-supplement.zip › FigS7b.png]

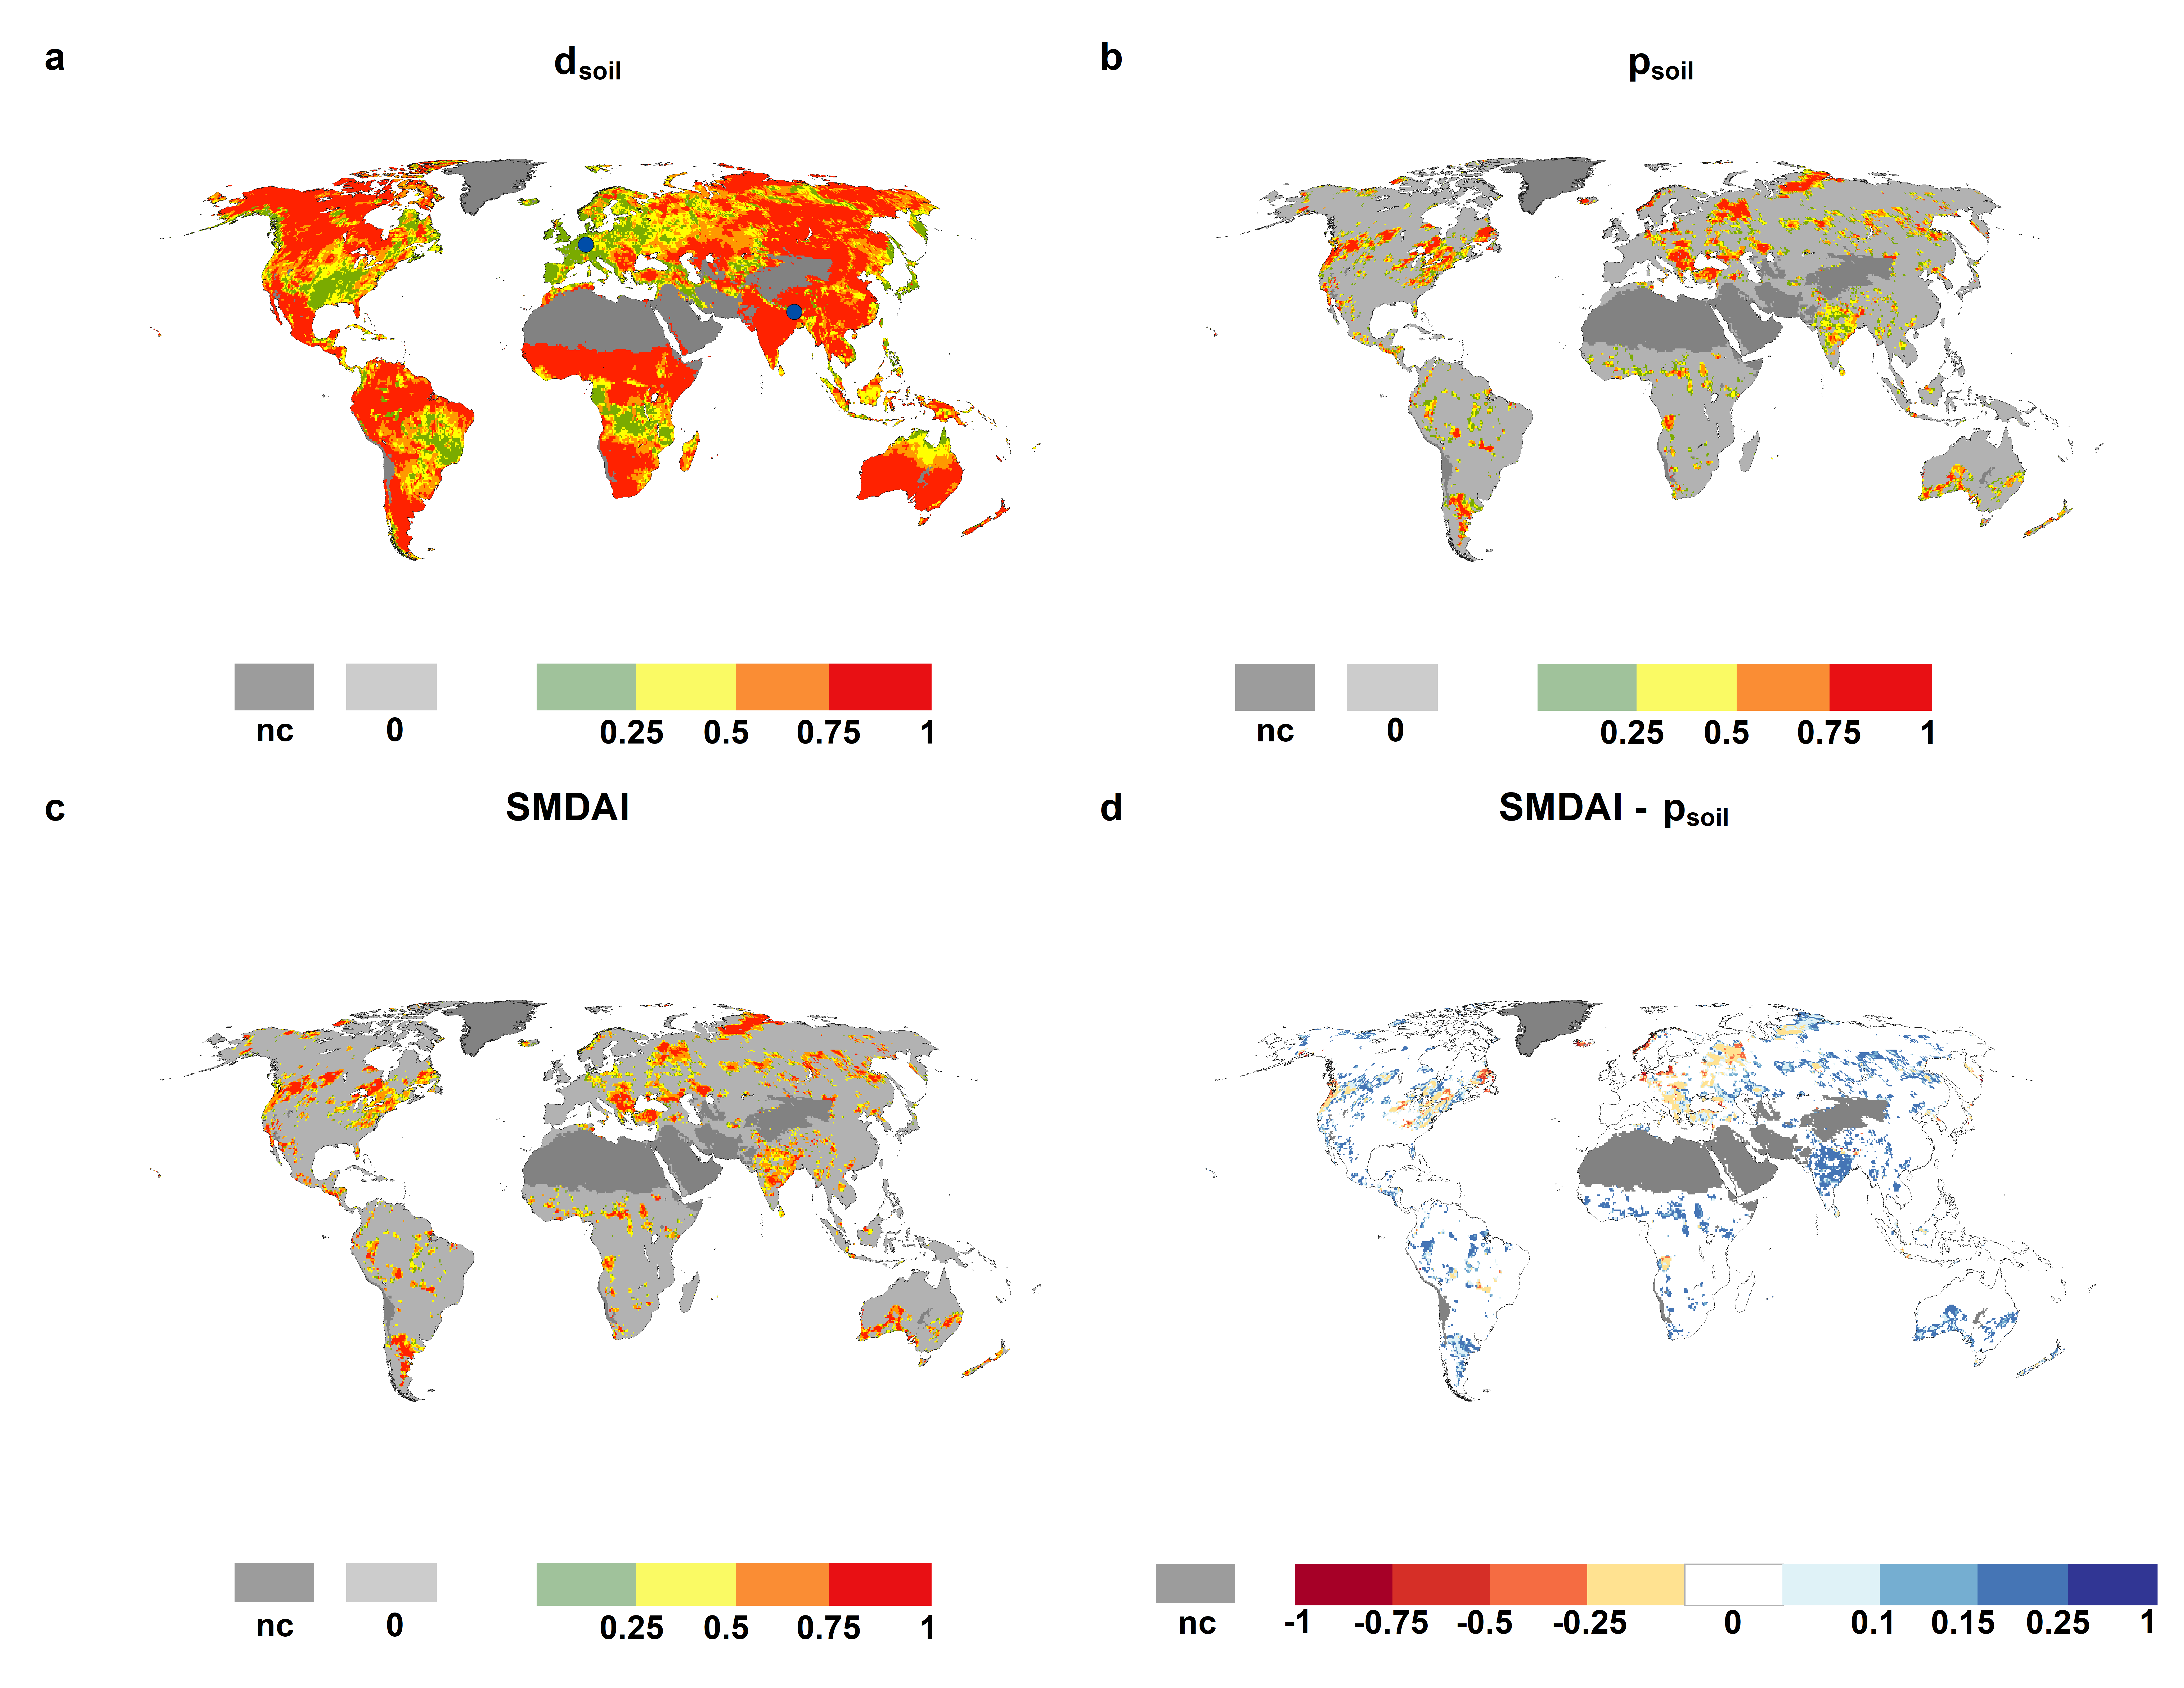

Supplement: Supplementary file 1 [file nhess-21-1337-2021-supplement.zip › FigS5.png]

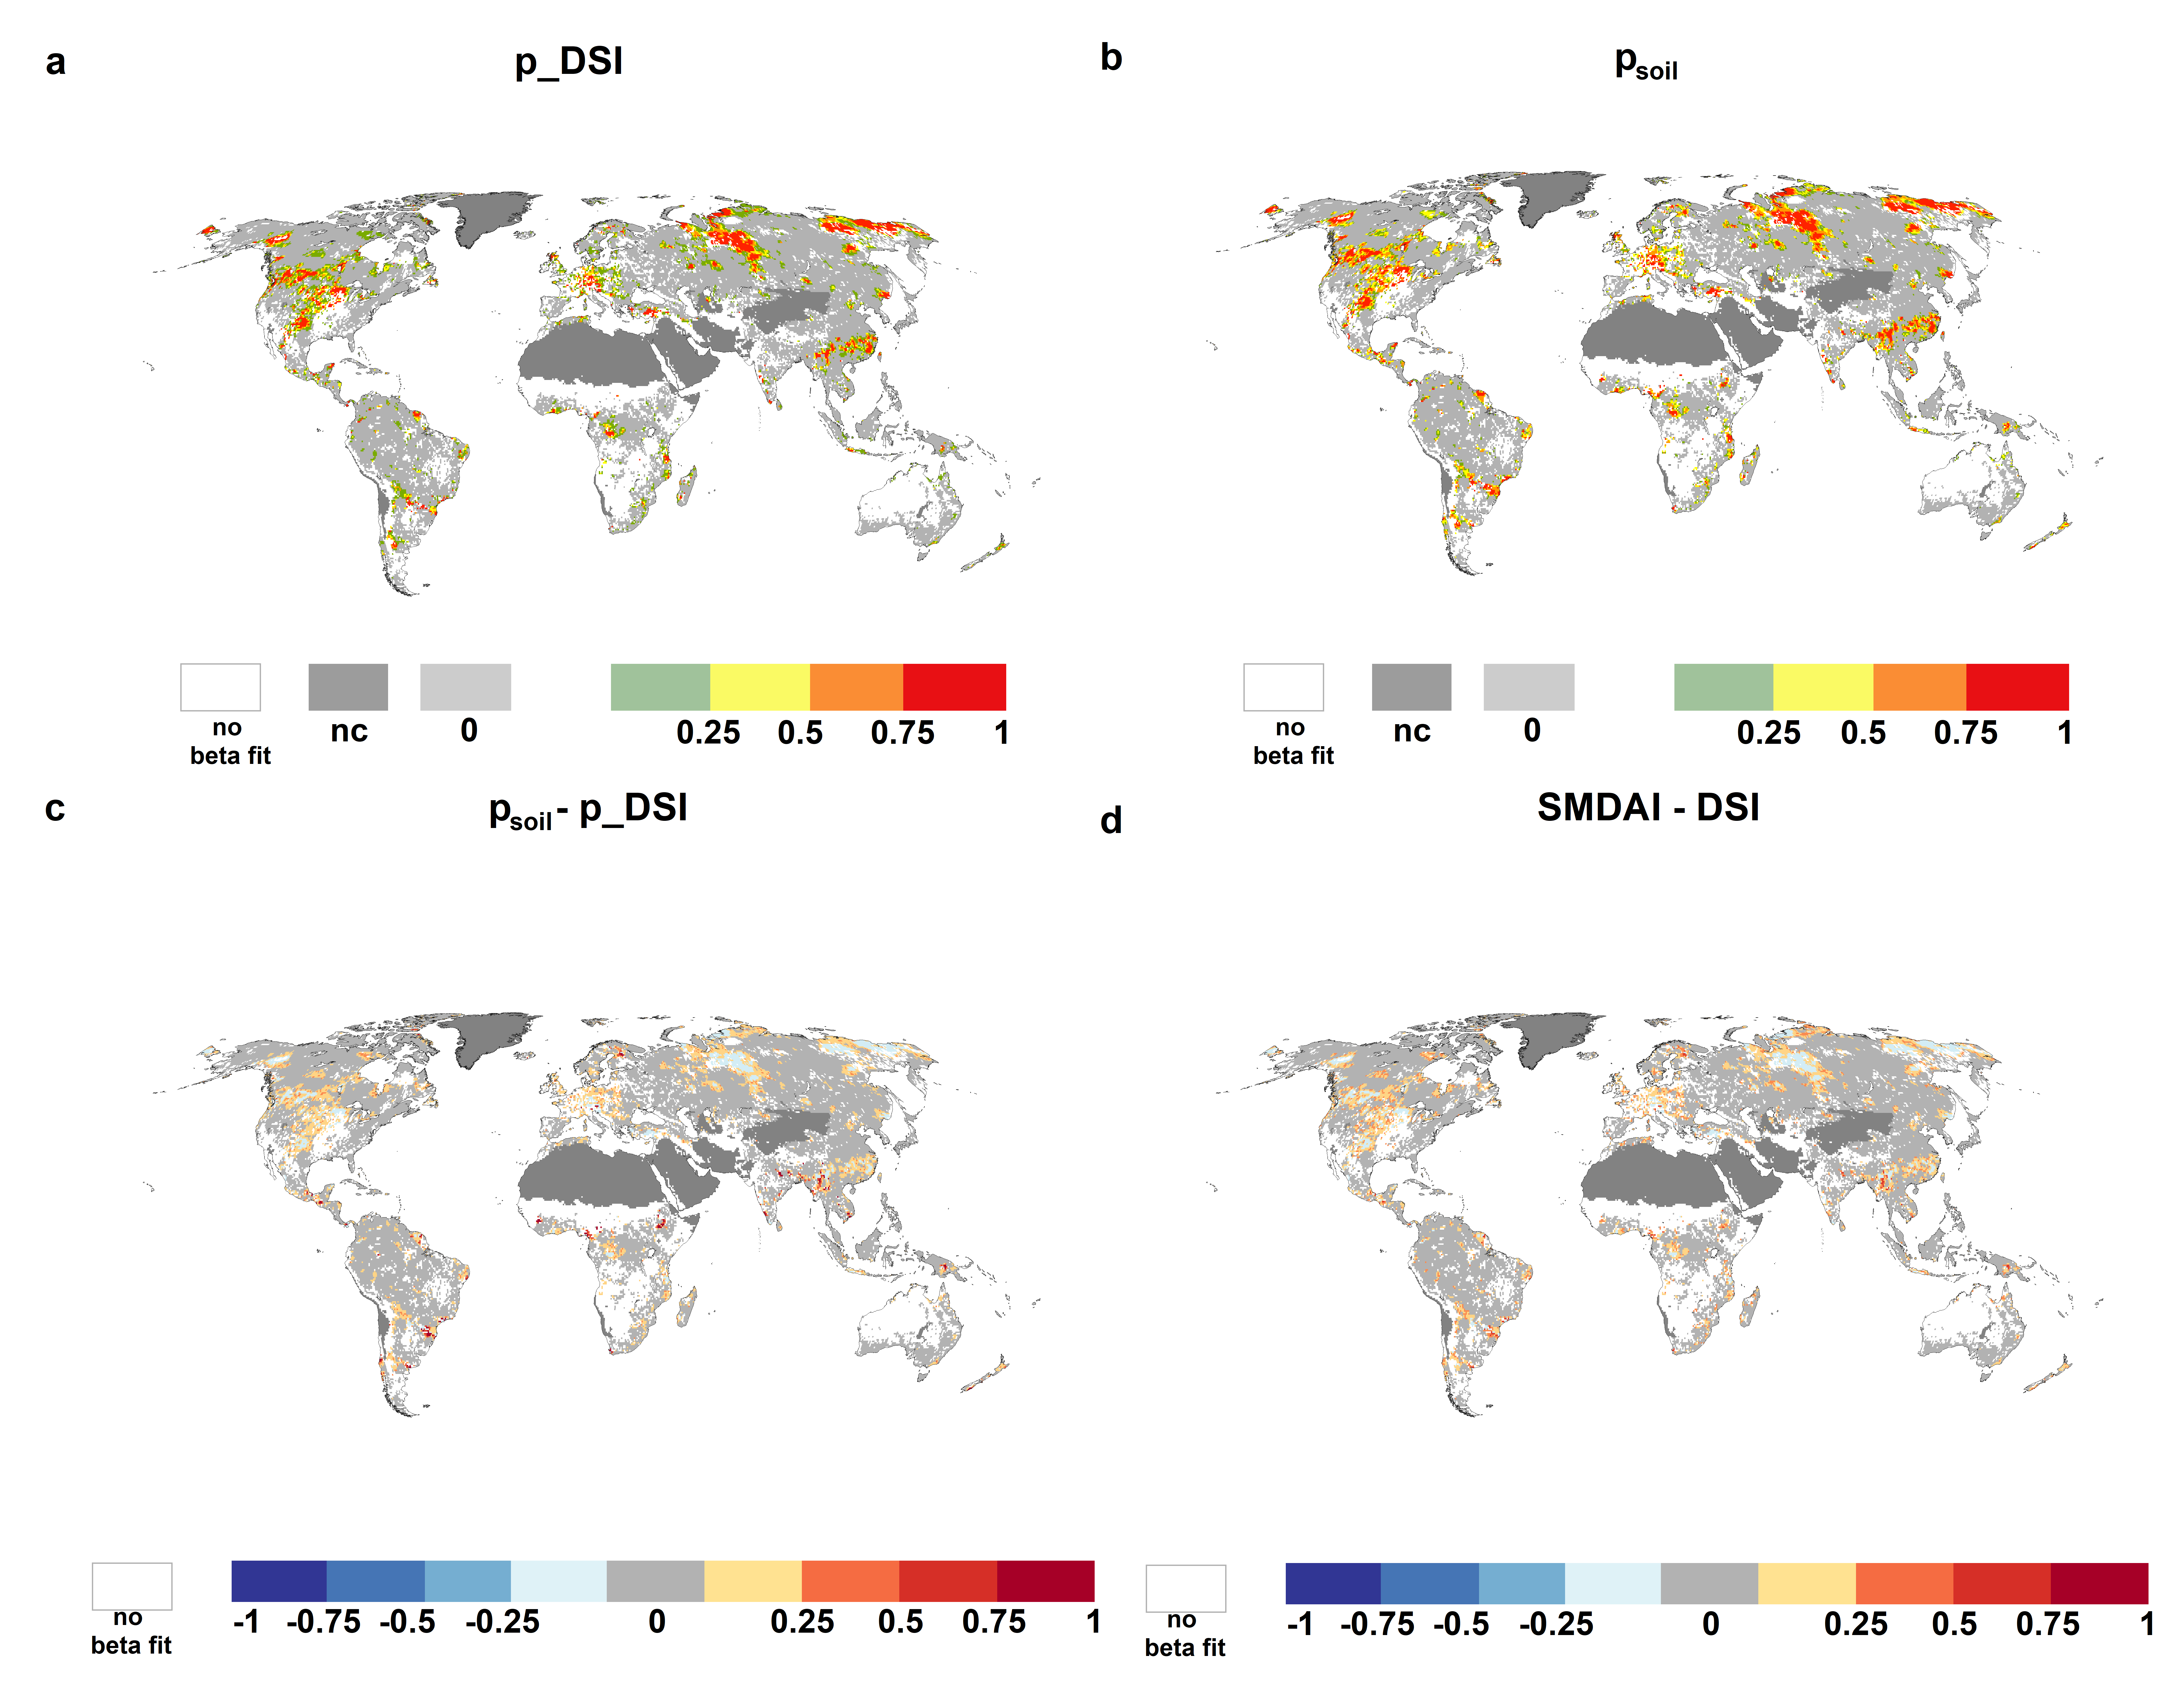

Supplement: Supplementary file 1 [file nhess-21-1337-2021-supplement.zip › FigS2.png]

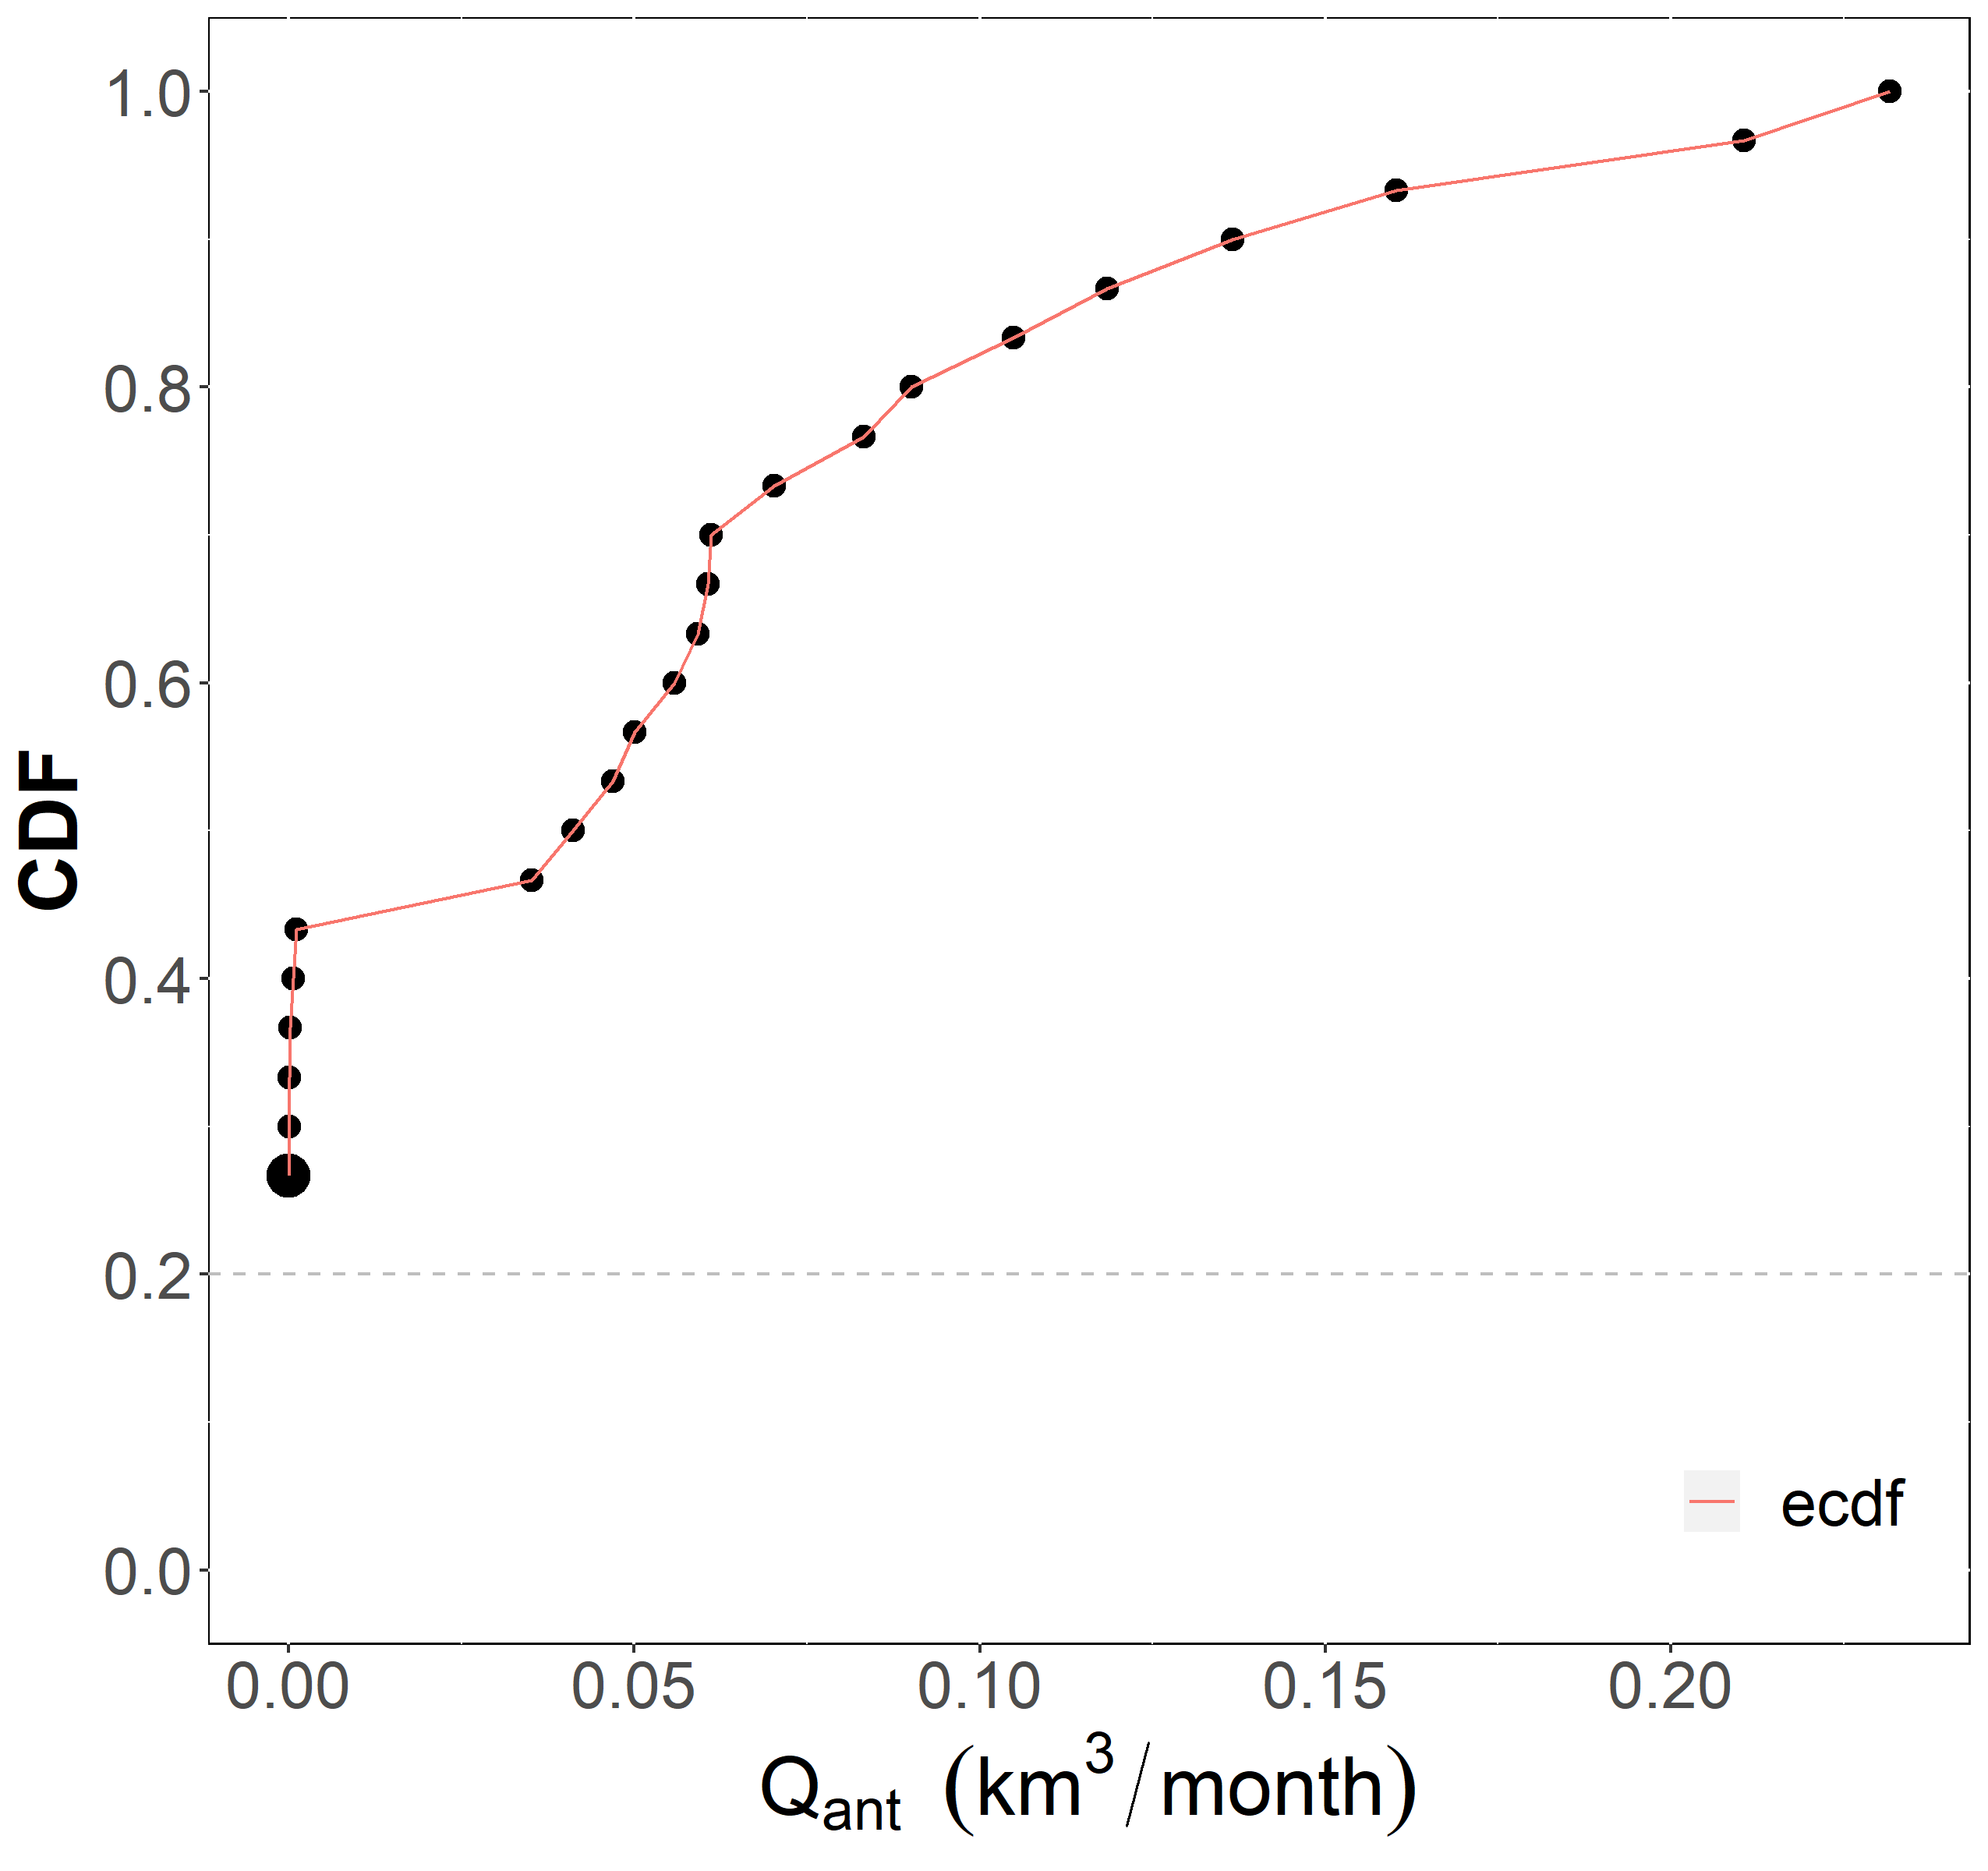

Supplement: Supplementary file 1 [file nhess-21-1337-2021-supplement.zip › FigS7a.png]

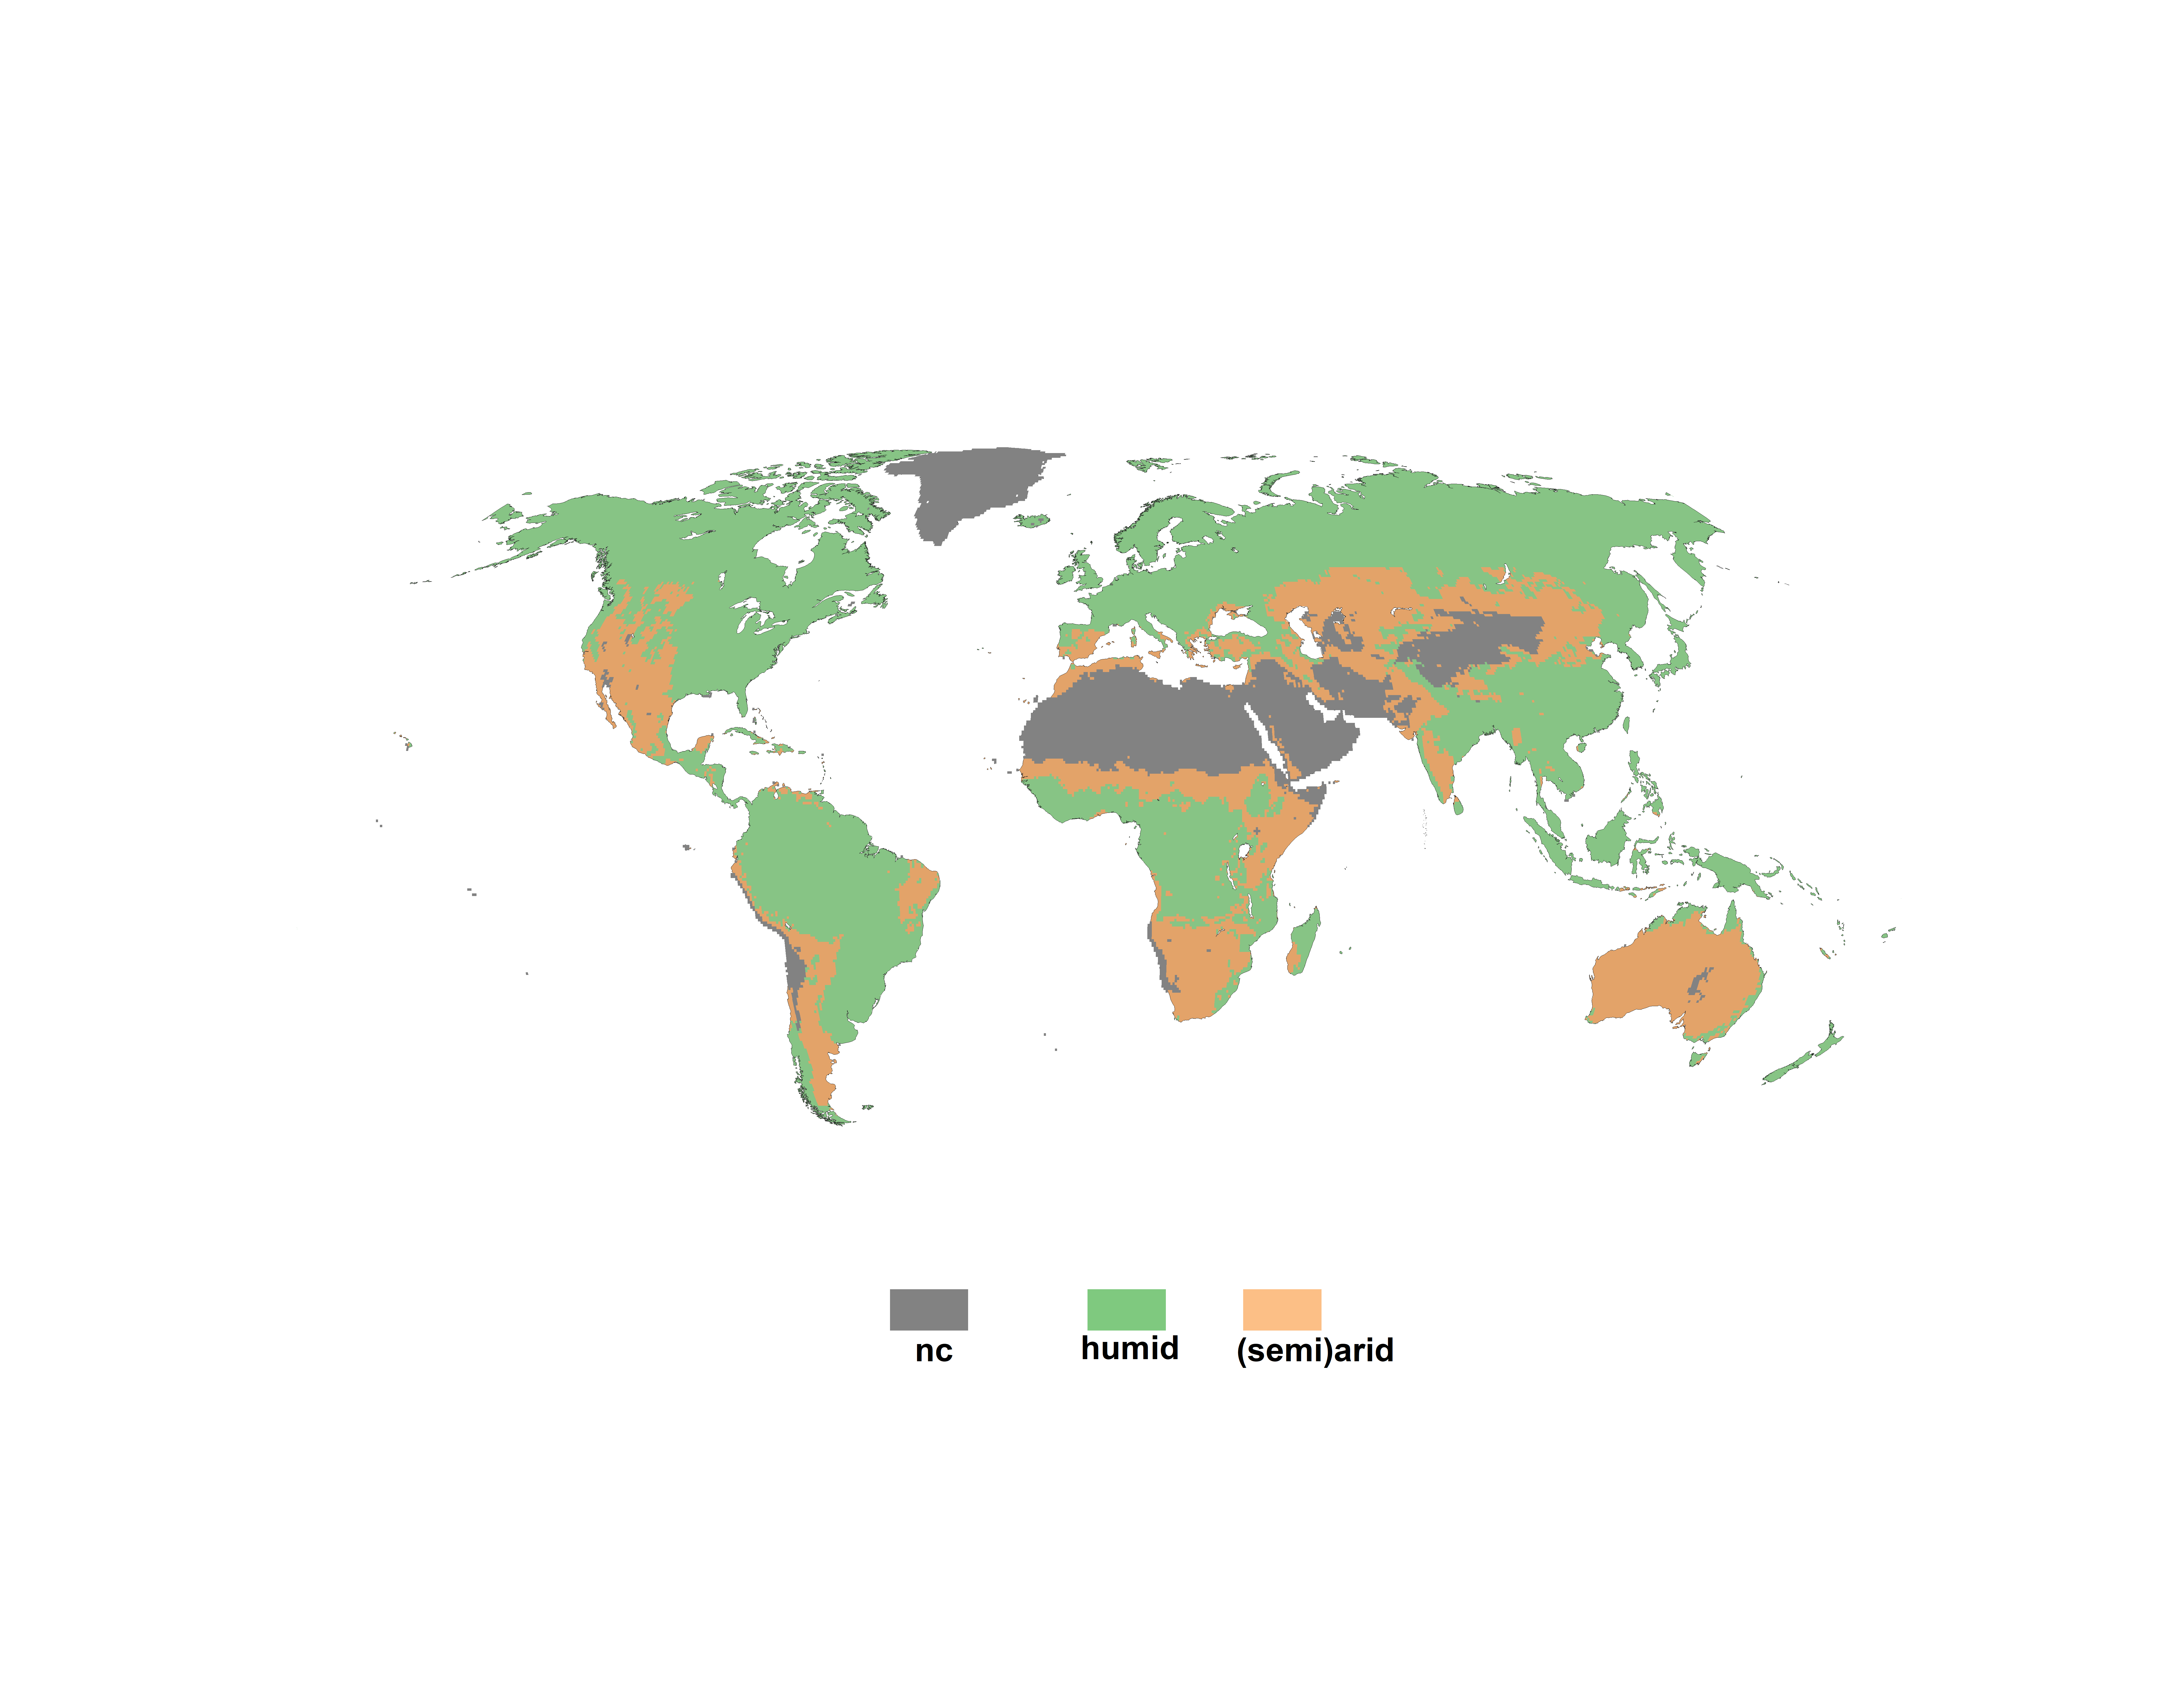

Supplement: Supplementary file 1 [file nhess-21-1337-2021-supplement.zip › FigS8.png]

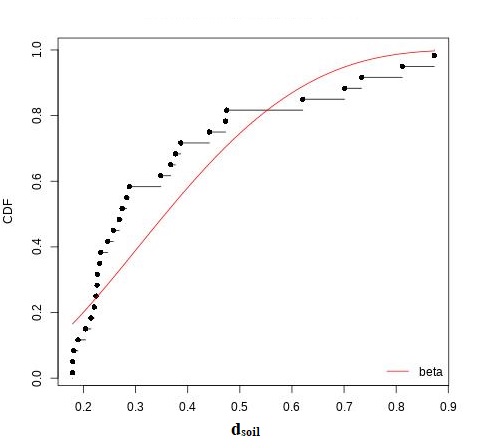

Supplement: Supplementary file 1 [file nhess-21-1337-2021-supplement.zip › FigS3.(b).jpg]

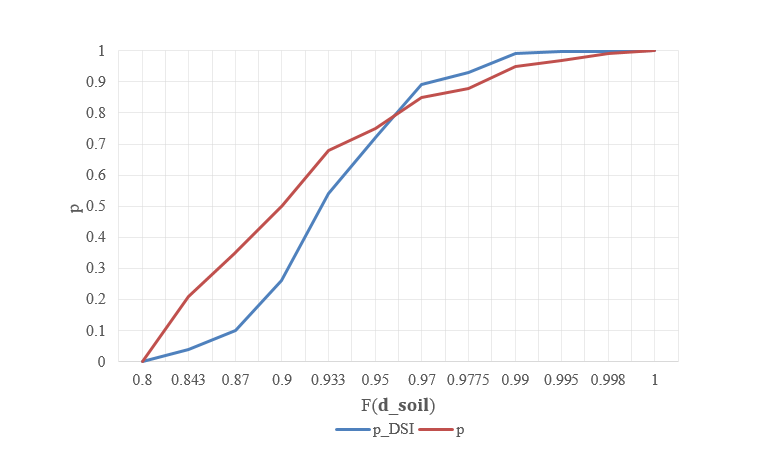

Supplement: Supplementary file 1 [file nhess-21-1337-2021-supplement.zip › FigS1.PNG]

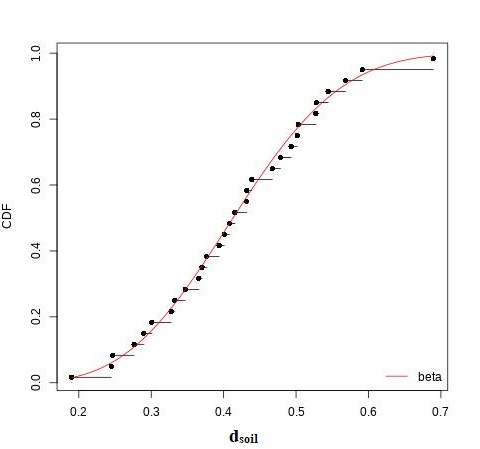

Supplement: Supplementary file 1 [file nhess-21-1337-2021-supplement.zip › FigS3.(a).jpg]
